# Supplementary material for: Improved antibacterial performance using hydrogel-immobilized lysozyme as a catalyst in water
Source: Royal Society of Chemistry journal article supplement (doi:10.1039/c9ra02464f), 2019-01-01
Supplement: c9ra02464f1.pdf [file c9ra02464f1.pdf]

Electronic Supplementary Information:

## **Improved anti-bacteria performance using hydrogel-immobilized lysozyme as catalyst in water**

Yuemei Ye, Stanislav Klimchuk, Mingwei Shang, Junjie Niu\*

Department of Materials Science and Engineering, CEAS, University of Wisconsin-Milwaukee  
Milwaukee, WI 53211

\*Corresponding author e-mail: [niu@uwm.edu](mailto:niu@uwm.edu) (J Niu)

### **Experimental details**

#### **Materials**

Lysozyme (lyophilized powder, protein  $\geq 90\%$ ,  $\geq 40000$  units/mg protein), poly (ethylene glycol) methacrylate (PEGMA, Mn: 575 g/mol), poly (ethylene glycol) diacrylate (PEGDA, Mn: 258 g/mol), acetone (99.8%) and 2-hydroxy-2-methylpropiophenone were purchased from Sigma Aldrich. Ethanol was purchased from Fisher Scientific. All samples with or without lysozyme were separately stored at  $-20\text{ }^{\circ}\text{C}$ ,  $4\text{ }^{\circ}\text{C}$  and  $25\text{ }^{\circ}\text{C}$  for activity tests.

#### **Synthesis of the hydrogel-immobilized lysozyme**

In a typical experiment, 0.5 ml PEGMA and PEGDA (1:10 volume ratio), 0.5g lysozyme powder and 5mg 2-hydroxy-4'-(2-hydroxyethoxy)-2-methylpropiophenone (initiator) (GC (area %), > 97.5 %; TCI) were mixed with 4.5ml deionized (DI) water. After stirring at 500 rpm for 10 min, the solution was irradiated under UV with a wavelength of 450 nm for 30 min until it formed the hydrogel.

### **Lysozyme activity test sample preparation**

The UV-Vis 2600 spectrophotometer was used for the activity test. 100 mg lysozyme powder, 0.32 mg/ml lysozyme in DI water and 1.0 g *h*-lysozyme samples were stored under -20, 4, 25 (RT), 60, 65, 70 and 80 °C in a refrigerator and an oven, respectively.

### **Measurement of lysozyme activity**

In a standard assay, whole cells of *Micrococcus lysodeikticus* in 0.1 M PBS (pH = 6.24) were used as substrate to determine the activity of lysozyme. The initial optical density of the UV-vis adsorption spectrum (UV-Vis 2600) was adjusted to reach approximately 1.3 at 450 nm wavelength by varying the ML concentration. After reacting with lysozyme at 25 °C, the change of optical density upon time was used to calculate the activity of lysozyme. A blank ML assay without lysozyme was used to subtract the background. The average value of three activity measurements was used to calculate. The lysozyme activity was tested every week in 2 months. The relative activity was calculated based on the activity of pure lysozyme powder stored under -20 °C. Since the activity decreases with time, we tested the activity within the first minute reaction<sup>37</sup>.

### **Recycling activity test**

The concentration of *Micrococcus lysodeikticus* was adjusted until the optical density of the UV-vis spectrum at 450 nm reached 1.3. Then 100  $\mu$ l lysozyme solution (6.4 mg/ml) was added into 900  $\mu$ l ML solution and started to record the OD<sub>450</sub> adsorption change in 700 seconds. When the adsorption decreased to almost zero, a desired volume of ML solution was added thus the OD<sub>450</sub> reached about 1.3 again. During the second cycle, the new OD<sub>450</sub> adsorption evolution was recorded in 700 seconds. This process was repeated until a minimum adsorption was reached.

### **Antibacterial measurements**

#### **Bacteria**

Gram-negative *E. coli*: W3110 containing the *ala*-TFPI gene, CMCC# 4807. Gram-positive *B. subtilis*: ATCC® 6633-MINI-PACK™.

### **Regrowth of E. coli**

The E. coli was cultured to reach a concentration of  $10^7$  CFU/ml in LB solution. The adsorbent materials were added into the solution and placed into a shaking incubator with 150 rpm speed at 37 °C for 8 hours. Then the OD<sub>600</sub> value (600nm wavelength) of 1ml sample was measured at 0, 2, 4, 6 and 8 hours. The average value upon three sample measurements was selected for analysis. 3.2 mg/ml UV irradiated lysozyme solution, 3.2 mg/ml lysozyme powder solution and 32 mg/ml hydrogel were used to normalize the lysozyme concentration for comparison. The natural grown E. coli under the same condition was used as control sample.

### **Inhibition of low concentration bacteria**

The E. coli and B. subtilis bacteria suspensions with a concentration of  $10^5$  CFU/ml were incubated and mixed with the adsorbents at 37 °C for 4 h at 150 rpm shaking speed, respectively. The adsorbents include control (pure E. coli or B. subtilis), 3.2 mg/ml UV irradiated lysozyme, 3.2 mg/ml hydrogel and 3.2 mg/ml h-lysozyme. The E. coli inhibition with 1 mg/ml lysozyme concentration was also checked. Survival concentration was obtained using the colony forming count method. The bacteria concentration was checked at 1<sup>st</sup>, 3<sup>rd</sup>, 5<sup>th</sup>, 26<sup>th</sup> and 30<sup>th</sup> hours, respectively. The average concentration upon three measurements was used.
